# Supplementary material for: Poorer Quality of Life and Treatment Satisfaction is Associated with Diabetic Retinopathy in Patients with Type 1 Diabetes without Other Advanced Late Complications
Source: PubMed Central journal article supplement (PMC6462963; doi:10.3390/jcm8030377), 2019-03-18
Supplement: jcm-08-00377-s001.pdf [file jcm-08-00377-s001.pdf]

Table S1. Multivariable linear regression for the Audit of Diabetes Dependent Quality of Life (ADDQoL-19) average weighted impact score.

|                   | <b>Estimate (95% CI)</b> | <b><i>p</i>-Value</b> |
|-------------------|--------------------------|-----------------------|
| (Intercept)       | -1.50 (-2.32; -0.69)     | <0.001                |
| Retinopathy       | -0.29 (-0.66; 0.07)      | 0.111                 |
| Age (years)       | -0.02 (-0.04; 0.00)      | 0.015                 |
| Physical activity | 0.58 (0.18; 0.99)        | 0.005                 |
| Smoker, current   | -0.14 (-0.53; 0.25)      | 0.481                 |
| Insulin dose      | 0.01 (0.00; 0.02)        | 0.028                 |

No significant contribution of the variables according to the likelihood ratio test: sex, race, educational level, hypertension, dyslipidaemia, diabetes duration, body mass index, waist circumference, systolic and diastolic blood pressure, triglycerides, glycated haemoglobin, microalbuminuria, HDL and LDL cholesterol. Coefficient of determination, *r*-squared = 7.4%.

Table S2. Bivariate analysis for the Audit of Diabetes Dependent Quality of Life (ADDQoL-19) and the Diabetes Treatment Satisfaction Questionnaire-status (DTSQ-s) by diabetic retinopathy status.

| Items                               | No DR<br>(n = 140)   | DR: Grade 1<br>(n = 83) | DR: Grade 2-4<br>(n = 19) | <i>p</i> -Value         |                            |                  |
|-------------------------------------|----------------------|-------------------------|---------------------------|-------------------------|----------------------------|------------------|
|                                     |                      |                         |                           | No DR vs<br>DR: Grade 1 | No DR vs. DR:<br>Grade 2-4 | <i>p</i> Overall |
| <b>ADDQoL-19</b>                    |                      |                         |                           |                         |                            |                  |
| Present QoL                         | 1.00 [1.00; 2.00]    | 1.00 [0.00; 1.00]       | 1.00 [0.00; 1.00]         | 0.040                   | 0.304                      | 0.068            |
| Diabetes-specific QoL               | -1.00 [-2.00; -1.00] | -2.00 [-2.00; -1.00]    | -2.00 [-2.00; -1.00]      | 0.119                   | 0.188                      | 0.272            |
| Leisure                             | -1.00 [-3.00; 0.00]  | -2.00 [-3.00; 0.00]     | -2.00 [-4.00; 0.00]       | 0.194                   | 0.536                      | 0.377            |
| Work life                           | 0.00 [-3.00; 0.00]   | -2.00 [-4.00; 0.00]     | -3.00 [-6.00; 0.00]       | 0.100                   | 0.083                      | 0.087            |
| Travels                             | -2.00 [-4.00; 0.00]  | -1.00 [-4.00; 0.00]     | 0.00 [-2.00; 0.00]        | 0.667                   | 0.086                      | 0.520            |
| Holidays                            | -2.00 [-3.00; 0.00]  | -2.00 [-3.00; 0.00]     | 0.00 [-4.00; 0.00]        | 0.794                   | 0.652                      | 0.914            |
| Physical ability                    | -2.00 [-4.00; 0.00]  | -2.00 [-4.00; 0.00]     | -2.00 [-3.00; 0.00]       | 0.143                   | 0.858                      | 0.542            |
| Family life                         | 0.00 [-3.00; 0.00]   | 0.00 [-3.00; 0.00]      | 0.00 [-3.00; 0.00]        | 0.407                   | 0.481                      | 0.645            |
| Friends/social life                 | 0.00 [0.00; 0.00]    | 0.00 [0.00; 0.00]       | 0.00 [0.00; 0.00]         | 0.546                   | 0.782                      | 0.968            |
| Personal relationship               | 0.00 [-2.00; 0.00]   | 0.00 [-2.00; 0.00]      | 0.00 [-3.00; 0.00]        | 0.187                   | 0.245                      | 0.450            |
| Sex life                            | 0.00 [-2.00; 0.00]   | 0.00 [-3.00; 0.00]      | 0.00 [-3.00; 0.00]        | 0.121                   | 0.111                      | 0.074            |
| Physical appearance                 | 0.00 [-1.00; 0.00]   | 0.00 [-2.00; 0.00]      | 0.00 [-1.00; 0.00]        | 0.056                   | 0.995                      | 0.166            |
| Self-confidence                     | 0.00 [-2.25; 0.00]   | 0.00 [-4.00; 0.00]      | 0.00 [-3.00; 0.00]        | 0.234                   | 0.837                      | 0.398            |
| Motivation                          | 0.00 [-2.00; 0.00]   | 0.00 [-2.00; 0.00]      | 0.00 [-2.00; 0.00]        | 0.970                   | 0.852                      | 0.598            |
| Society/people's reaction           | 0.00 [0.00; 0.00]    | 0.00 [0.00; 0.00]       | 0.00 [0.00; 0.00]         | 0.535                   | 0.247                      | 0.472            |
| Future                              | -2.00 [-4.00; 0.00]  | -2.00 [-6.00; 0.00]     | -2.00 [-6.00; 0.00]       | 0.206                   | 0.300                      | 0.389            |
| Finances                            | 0.00 [0.00; 0.00]    | 0.00 [0.00; 0.00]       | 0.00 [0.00; 0.00]         | 0.135                   | 0.137                      | 0.223            |
| Living conditions                   | 0.00 [0.00; 0.00]    | 0.00 [0.00; 0.00]       | 0.00 [0.00; 0.00]         | 0.475                   | 0.422                      | 0.423            |
| Dependence                          | 0.00 [-3.00; 0.00]   | -2.00 [-4.00; 0.00]     | -2.00 [-4.00; 0.00]       | 0.005                   | 0.320                      | 0.055            |
| Freedom to eat                      | -4.00 [-6.00; -2.00] | -6.00 [-9.00; -2.00]    | -4.00 [-9.00; -2.00]      | 0.407                   | 0.786                      | 0.625            |
| Freedom to drink                    | -2.00 [-4.50; 0.00]  | -4.00 [-7.00; 0.00]     | -2.00 [-6.00; 0.00]       | 0.117                   | 0.858                      | 0.231            |
| AWI                                 | -1.32 [-2.05; -0.68] | -1.60 [-2.70; -1.00]    | -1.50 [-2.50; -0.90]      | 0.038                   | 0.372                      | 0.186            |
| <b>DTSQ-s</b>                       |                      |                         |                           |                         |                            |                  |
| Hyperglycaemia frequency perception | 3.00 [2.00; 4.00]    | 3.00 [2.00; 4.00]       | 3.00 [3.00; 4.00]         | 0.683                   | 0.253                      | 0.386            |
| Hypoglycaemia frequency perception  | 2.00 [2.00; 3.00]    | 3.00 [2.00; 4.00]       | 3.00 [2.00; 4.00]         | 0.098                   | 0.032                      | 0.051            |
| Final score                         | 28.00 [23.00; 31.00] | 27.00 [24.00; 31.00]    | 29.00 [25.00; 32.00]      | 0.530                   | 0.316                      | 0.486            |

Data are shown as median [interquartile]. AWI, average weighted impact score; DR, diabetic retinopathy; QoL, quality of life. Grade 1: mild diabetic retinopathy; Grade 2-4: moderate, severe and proliferative diabetic retinopathy.

Table S3. Multivariable linear regression for the Diabetes Treatment Satisfaction Questionnaire-status (DTSQ-s) final score.

|                                     | <b>Estimate (95% CI)</b> | <b><i>p</i>-Value</b> |
|-------------------------------------|--------------------------|-----------------------|
| (Intercept)                         | 27.72 (25.45; 29.98)     | <0.001                |
| Retinopathy                         | -0.91 (-2.46; 0.63)      | 0.244                 |
| Smoker, current                     | 0.37 (-1.20; 1.93)       | 0.643                 |
| Diabetes duration if women          | -0.02 (-0.11; 0.07)      | 0.716                 |
| Diabetes duration if men            | 0.24 (0.13; 0.36)        | <0.001                |
| Men if diabetes duration > 20 years | 0.39 (-1.03; 1.80)       | 0.588                 |

No significant contribution of the variables according to the likelihood ratio test: age, sex, race, educational level, insulin dose, physical activity, hypertension, dyslipidaemia, body mass index, waist circumference, systolic and diastolic blood pressure, triglycerides, glycated haemoglobin, microalbuminuria, HDL and LDL cholesterol. Coefficient of determination, *r*-squared: 7.5%. The interaction between sex and diabetes duration was statistically significant with a *p*-value of 0.0003.
